# Supplementary material
Source: Springer Nature journal article supplement (https://www.springermedizin.de/resource/supplementary/13223_2013_406_MOESM2_ESM.pdf/9596640)
Supplement: MOESM2 [file 9596640]

Patient A

Patient B

Unstimulated  
Naïve T cells

Stimulated  
Naïve T cells

Stimulated  
Naïve T cells

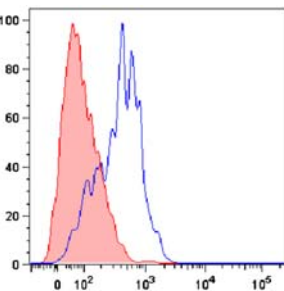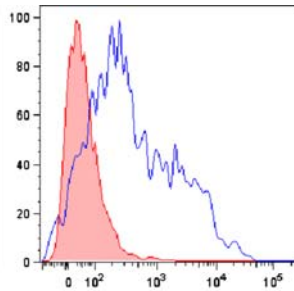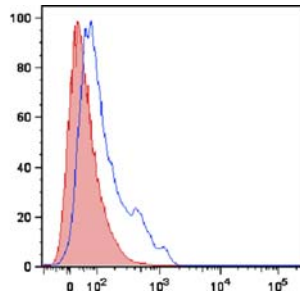

LAG-3

LAG-3

LAG-3

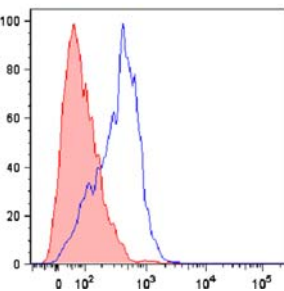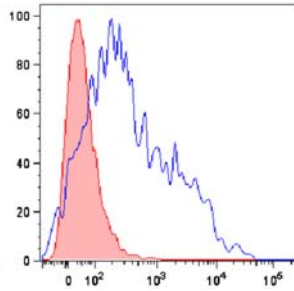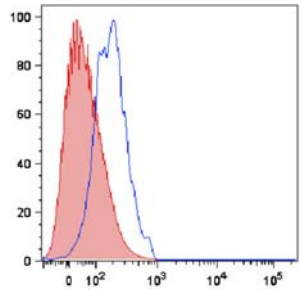

CTLA-4

CTLA-4

CTLA-4
